1 **Reduced antibody activity against SARS-CoV-2 B.1.617.2 Delta virus in**  
2 **serum of mRNA-vaccinated patients receiving TNF- $\alpha$  inhibitors**

3  
4 Rita E. Chen<sup>1,2</sup>, Matthew J. Gorman<sup>3</sup>, Daniel Y. Zhu<sup>4</sup>, Juan Manuel Carreño<sup>5</sup>, Dansu Yuan<sup>3</sup>,  
5 Laura A. VanBlargan<sup>1</sup>, Samantha Burdess<sup>1</sup>, Douglas A. Lauffenburger<sup>4</sup>, Wooseob Kim<sup>2</sup>, Jackson  
6 S. Turner<sup>2</sup>, Lindsay Droit<sup>2</sup>, Scott A. Handley<sup>2</sup>, Salim Chahin<sup>6</sup>, Parakkal Deepak<sup>1</sup>, Jane A.  
7 O'Halloran<sup>1</sup>, Michael Paley<sup>1</sup>, Rachel M. Presti<sup>1</sup>, Gregory F. Wu<sup>6</sup>, Florian Krammer<sup>5</sup>, Galit  
8 Alter<sup>3</sup>, Ali H. Ellebedy<sup>2,7,8</sup>, Alfred H. J. Kim<sup>1,8</sup>, and Michael S. Diamond<sup>1,2,7,8,9†</sup>

9  
10  
11 <sup>1</sup>Department of Medicine, Washington University School of Medicine, St. Louis, MO.

12 <sup>2</sup>Department of Pathology & Immunology, Washington University School of Medicine, St.  
13 Louis, MO.

14 <sup>3</sup>Ragon Institute of MGH, MIT and Harvard, Cambridge, MA.

15 <sup>4</sup>Massachusetts Institute of Technology, Cambridge, MA, USA.

16 <sup>5</sup>Department of Microbiology, Icahn School of Medicine at Mount Sinai, New York, NY.

17 <sup>6</sup>Department of Neurology, Washington University School of Medicine, St. Louis, MO.

18 <sup>7</sup>Andrew M. and Jane M. Bursky Center for Human Immunology and Immunotherapy Programs,  
19 Washington University School of Medicine, Saint Louis, MO.

20 <sup>8</sup>Center for Vaccines and Immunity to Microbial Pathogens, Washington University School of  
21 Medicine, Saint Louis, MO.

22 <sup>9</sup>Department of Molecular Microbiology, Washington University School of Medicine, St. Louis,  
23 MO.

24  
25 † **Corresponding author:** Michael S. Diamond, M.D., Ph.D., [diamond@wusm.wustl.edu](mailto:diamond@wusm.wustl.edu)

26 **SUMMARY**

27           Although vaccines effectively prevent COVID-19 in healthy individuals, they appear less  
28 immunogenic in individuals with chronic inflammatory diseases (CID) and/or under chronic  
29 immunosuppression, and there is uncertainty of their activity against emerging variants of  
30 concern in this population. Here, we assessed a cohort of 74 CID patients treated as monotherapy  
31 with chronic immunosuppressive drugs for functional antibody responses in serum against  
32 historical and variant SARS-CoV-2 viruses after immunization with Pfizer mRNA BNT162b2  
33 vaccine. Longitudinal analysis showed the greatest reductions in neutralizing antibodies and Fc  
34 effector function capacity in individuals treated with TNF- $\alpha$  inhibitors, and this pattern appeared  
35 worse against the B.1.617.2 Delta virus. Within five months of vaccination, serum neutralizing  
36 titers of the majority of CID patients fell below the presumed threshold correlate for antibody-  
37 mediated protection. Thus, further vaccine boosting or administration of long-acting prophylaxis  
38 (*e.g.*, monoclonal antibodies) likely will be required to prevent SARS-CoV-2 infection in this  
39 susceptible population.

## 40 INTRODUCTION

41 In December 2019, severe acute respiratory syndrome coronavirus 2 (SARS-CoV-2)  
42 emerged and the global COVID-19 pandemic began. Since then, many antibody-based  
43 therapeutics and vaccines have been developed (Case et al., 2021; Sempowski et al., 2020) with  
44 some given Emergency Use Authorization (EUA) or Food and Drug Administration approval  
45 (e.g., BNT162b2 mRNA vaccine) in hopes of preventing infection and severe disease. While  
46 several of these countermeasures show efficacy against historical (2019-early 2020) SARS-CoV-  
47 2 strains, the emergence of variants of concern (VOC) has prompted questions as to whether they  
48 will retain efficacy.

49 SARS-CoV-2 spike protein engages cell-surface receptor angiotensin-converting enzyme  
50 2 (ACE2) for attachment and entry into human cells (Letko et al., 2020). The S1 component of  
51 the spike protein contains the N-terminal (NTD) and receptor binding (RBD) domains, the latter  
52 being the primary target of neutralizing antibodies (Cao et al., 2020; Pinto et al., 2020; Shi et al.,  
53 2020; Zost et al., 2020). However, recent studies have shown that therapeutic monoclonal and  
54 vaccine-elicited polyclonal antibodies have reduced neutralizing activity against VOC, likely  
55 because these strains contain mutations within the RBD and the receptor binding motif (RBM)  
56 (Chen et al., 2021a; Chen et al., 2021b; Liu et al., 2021b; Liu et al., 2021c; Wang et al., 2021b).  
57 This observation is concerning since serum neutralizing antibody titers are believed to be an *in*  
58 *vitro* correlate of *in vivo* protection (Corbett et al., 2021a; Corbett et al., 2021b; Francica et al.,  
59 2021).

60 Most studies on the immunogenicity and efficacy of SARS-CoV-2 vaccines have focused  
61 on immunocompetent animals and humans. As SARS-CoV-2 has been documented to mutate  
62 and evolve in immunocompromised hosts (Choi et al., 2020; Clark et al., 2021), it is important to

63 understand whether vaccine-elicited responses are protective and durable in this population. Just  
64 recently, the Centers for Disease Control and Prevention recommended an additional BNT162b2  
65 mRNA dose for the immunocompromised notwithstanding the relatively limited study of effects  
66 of immunosuppression on the immunogenicity and protection following SARS-CoV-2  
67 vaccination. Here, we examine a cohort of chronic inflammatory disease (CID) patients from the  
68 COVID-19 Vaccine Responses in Patients with Autoimmune Disease (COVaRiPAD) study  
69 (Deepak et al., 2021) receiving different treatment regimens for functional antibody responses  
70 against SARS-CoV-2 at three- and five-months after completion of a two-dose BNT162b2  
71 mRNA vaccination regimen.

72

## 73 RESULTS

74 Although the potency of neutralization by monoclonal antibodies (mAbs) can be affected  
75 greatly by small numbers of mutations in emerging SARS-CoV-2 strains (Chen et al., 2021a;  
76 Chen et al., 2021b; Planas et al., 2021; Wang et al., 2021a; Wang et al., 2021b), it remains less  
77 clear how polyclonal antibodies derived after vaccination that target multiple epitopes perform.  
78 Whereas the efficacy of mRNA vaccine protection in immunocompetent volunteers has been  
79 high (>90%) against historical and some emerging SARS-CoV-2 strains (*e.g.*, B.1.1.7 [Alpha])  
80 (Abu-Raddad et al., 2021; Chemaitelly et al., 2021), there are concerns for breakthrough  
81 infections in immunosuppressed individuals or those receiving immunomodulatory drugs  
82 because of blunted immune responses, waning immunity, or evasion by emerging variants  
83 including B.1.351 (Beta) and B.1.617.2 (Delta). We assessed the neutralizing activity of serum  
84 from individuals immunized with the BNT162b2 mRNA vaccine against fully infectious SARS-  
85 CoV-2 strains including recombinant WA1/2020 viruses encoding D614G (WA1/2020 D614G)  
86 or the B.1.351 (Beta) spike (Wash-B.1.351) and a clinical isolate of B.1.617.2 (Delta). All  
87 viruses were passaged in Vero-TMPRSS2 cells to minimize adventitious generation of furin  
88 cleavage site mutations (Klimstra et al., 2020) and confirmed by deep sequencing (**Table S1**).

89 We obtained sera from a cohort of CID patients 3 months after BNT162b2 mRNA  
90 vaccination. This group included patients with Crohn's disease, ulcerative colitis, asthma,  
91 multiple sclerosis, ankylosing spondylitis, systemic lupus erythematosus, Sjögren's syndrome,  
92 Hashimoto's disease, psoriasis, rheumatoid arthritis and undifferentiated inflammatory arthritis,  
93 type 1 diabetes, combined variable immune deficiency, alopecia areata, uveitis, vasculitis,  
94 scleroderma, psoriatic arthritis, anti-neutrophil cytoplasmic antibody (ANCA)-associated  
95 vasculitis, and microscopic colitis (**Table 1**). Because of their disease severity, some patients

96 received multiple drug interventions. For our analysis, we focused on subjects (n = 74) treated  
97 with a single immunomodulatory agent so we could correlate treatment interventions with  
98 immunological outcomes. This included patients receiving chronic treatment with  
99 antimetabolites (n = 12), TNF- $\alpha$  inhibitors (TNFi) (n = 11), antimalarial agents (n = 10), anti-  
100 integrin inhibitors (n = 10), non-steroidal anti-inflammatory drugs (NSAIDs) (n = 9), anti-IL-23  
101 inhibitor (n = 9), B cell depletion therapy (BCDT) (n = 5), Bruton's tyrosine kinase inhibitor  
102 (BTKi) (n = 1), nuclear factor-erythroid factor 2-related factor 2 (Nrf2) activator (n = 1),  
103 sulfasalazine (SSZ) (n = 1), systemic steroids (n = 2), anti-B lymphocyte stimulator (anti-BLyS)  
104 (n=1), or sphingosine 1-phosphate receptor modulator (S1PR mod) (n = 1).

105 We first used an ELISA to assess serum IgG binding to spike proteins of Wuhan-1  
106 (historical) or three dominant circulating variants: B.1.1.7, B.1.351, and B.1.617.2. When  
107 analyzed for relative binding to the different spike proteins, sera from individual  
108 immunocompetent, healthy volunteers (n = 25) (Turner et al., 2021), CID patients (n = 45), or  
109 CID patients treated with antimalarial monotherapy showed slightly reduced (1.5-fold) binding  
110 to B.1.1.7, B.1.351, and B.1.617.2 than to Wuhan-1 spike protein (**Fig 1A-B and E**). Serum IgG  
111 titers from CID patients as a group trended lower against the historical and variant spike proteins  
112 than immunocompetent volunteers, although the differences did not attain statistical significance  
113 (WT:  $p = 0.6$ ; B.1.1.7:  $p = 0.29$ ; B.1.351:  $p = 0.14$ ; B.1.617.2:  $p = 0.23$ ) (**Fig 1A-B**). Anti-spike  
114 IgG binding titers of subjects receiving TNFi trended lower (2 to 3-fold) than immunocompetent  
115 controls (WT:  $p = 0.6$ ; B.1.1.7:  $p = 0.48$ ; B.1.351:  $p = 0.3$ ; B.1.617.2:  $p = 0.4$ ) (**Fig 1A and C**).  
116 Most other drug treatment groups with enough patients enrolled ( $n \geq 3$ ) did not show differences  
117 in anti-spike IgG binding titers compared to the controls (**Fig 1D-G**). Other treatment groups had

118 too few patients enrolled to interpret trends, but as expected, patients receiving BCDT had low  
119 levels of IgG against the spike proteins (**Fig S1**).

120 To begin to determine the functional capacity of the antibody response, we interrogated  
121 sera obtained from immunocompetent volunteers (n = 25) and CID patients (n = 74) three  
122 months after their second dose of BNT162b2 mRNA vaccine. As a group, sera from CID  
123 patients trended towards lower neutralizing activity, although comparisons did not attain  
124 statistical significance (WA1/2020 D614G (Geometric mean titer [GMT]: 239  
125 [immunocompetent] versus 177 [CID patients],  $p = 0.98$ ); Wash-B.1.351 (GMT: 117  
126 [immunocompetent] versus 80 [CID patients],  $p = 0.67$ ); and B.1.617.2 (GMT: 109  
127 [immunocompetent] versus 84 [CID patients],  $p = 0.98$ ) (**Fig 2A-B**). In both control and CID  
128 patient groups, the B.1.351 and B.1.617.2 variants were neutralized less efficiently than the  
129 historical WA1/2020 D614G strain, as reported previously (Chen et al., 2021b; Liu et al., 2021a;  
130 Liu et al., 2021b; Planas et al., 2021; Wang et al., 2021a). Among the treatment subgroups,  
131 patients receiving TNFi had lower neutralizing titers (GMT: 239 (immunocompetent) versus 104  
132 (TNFi) [WA1/2020 D614G],  $p = 0.26$ ; 117 versus 46 [Wash-B.1.351]  $p = 0.04$ ; 109 versus 50  
133 [B.1.617.2],  $p = 0.15$ ) (**Fig 2A and D**). Other treatment groups (n > 5) including antimalarial,  
134 anti-integrin, NSAIDs, and anti-IL-23 inhibitors had similar neutralization titers to  
135 immunocompetent volunteers (**Fig 2A and E-H**). In addition, all subgroups with n > 5  
136 neutralized Wash-B.1.351 and B.1.617.2 less efficiently than WA1/2020 (**Fig 2A-H**). These  
137 trends in neutralization titers also were seen in groups receiving other immunosuppressive agents  
138 with smaller number of individuals (**Fig S2**).

139 A recent study analyzing the relationship between *in vitro* neutralization titers and  
140 protection against SARS-CoV-2 infection by vaccines estimated a protective serum titer of 1/54

141 (range 1/10 to 1/200 depending on the assay used) (Khoury et al., 2021). Given this result, we  
142 determined the fraction of individuals in the different groups of our cohort that fell below this  
143 cut-off. Three months after the completion of the initial series of BNT162b2 mRNA vaccine,  
144 only 2 of 25 (8%) immunocompetent volunteers had neutralizing titers ( $NT_{50}$ ) below 1/50 against  
145 B.1.617.2, whereas 30 of 74 (35%) of CID patients had titers below this level (**Table 2**). Many of  
146 the drug treatment groups also had a higher percentage of individuals below the 1/50 cut-off than  
147 immunocompetent volunteers including antimetabolites (33%), TNFi (64%), antimalarial agents  
148 (30%), NSAIDs (11%), and anti-IL-23 inhibitor (22%) (**Table 2**).

149 We separately grouped the individuals by disease and re-analyzed neutralization titers at  
150 three months after second vaccination. Some patient groups with certain diseases (*e.g.*, ulcerative  
151 colitis, systemic lupus erythematosus, Sjogren's syndrome, rheumatoid arthritis, and asthma) had  
152 neutralization titers that were similar to immunocompetent volunteers (**Fig 2A and S3**). In  
153 comparison, subjects with Crohn's disease trended towards lower neutralization titers than  
154 healthy individuals (GMT: 239 (healthy) versus 159 (Crohn's disease) [WA1/2020 D614G],  $p =$   
155 0.67; 117 versus 68 [Wash-B.1.351]  $p = 0.34$ ; 109 versus 73 [B.1.617.2],  $p = 0.50$ ) (**Fig 2A and**  
156 **S3**). Since TNFi is an important therapeutic target in Crohn's disease, we stratified this group by  
157 treatment class. Crohn's disease patients administered TNFi trended towards lower neutralizing  
158 titers than ones receiving other treatments (GMT: 107 (Crohn's with TNFi) versus 198 (Crohn's  
159 disease without TNFi) [WA1/2020 D614G],  $p = 0.27$ ; 46 versus 85 [Wash-B.1.351]  $p = 0.30$ ; 49  
160 versus 93 [B.1.617.2],  $p = 0.26$ ) (**Fig S3**). Compared to 34% of all CID patients at 3 months after  
161 second vaccination that had a neutralization titer of less than 1/50 against B.1.617.2, 50% of  
162 Crohn's disease patients fell below this threshold (**Fig S3**). Moreover, 63% of Crohn's disease  
163 patients receiving TNFi had neutralization titers against B.1.617.2 below the 1/50 cut-off



164 compared to 43% of those on other treatment regimens (**Fig S3**). Thus, while Crohn's disease  
165 patients had lower neutralizing titers after BNT162b2 mRNA vaccination than other CID  
166 patients, this effect appears confounded by TNFi use. Indeed, multivariable regression analysis  
167 indicated that the lower neutralization titers against B.1.617.2 were associated TNFi treatment  
168 and not Crohn's disease (**Table 3**).

169       Recent studies have shown that the Fc effector functions of antibodies can contribute to  
170 protection against SARS-CoV-2 infection and disease (Chan et al., 2021; Schäfer et al., 2021;  
171 Shiakolas et al., 2021; Winkler et al., 2021; Yamin et al., 2021; Zohar et al., 2020). To address  
172 whether our immunized CID patients had distinct Fc effector function profiles, we analyzed their  
173 SARS-CoV-2 specific antibodies in sera for IgG subclass distribution and C1q and Fc $\gamma$  receptor  
174 (Fc $\gamma$ R) binding. We focused our analyses on groups with at least n = 5: anti-integrin inhibitors,  
175 antimetabolites, TNFi, antimalarial agents, and immunocompetent volunteers, and measured  
176 responses against Wuhan-1 D614G, B.1.617.2, and B.1.351 spike proteins (**Fig 3** and **S4**). There  
177 were no differences in levels of IgG1, IgG3, and IgM against SARS-CoV-2 spike proteins, and  
178 C1q or Fc $\gamma$ R (Fc $\gamma$ R2A, Fc $\gamma$ R2B, or Fc $\gamma$ R3A) binding (**Fig 3** and **S4**). However, compared to  
179 immunocompetent volunteers, patients treated with TNFi had decreased anti-SARS-CoV-2 IgG,  
180 IgG2, and IgG4 levels against Wuhan-1 D614G (**Fig 3A**), B.1.617.2 (**Fig 3B**), and B.1.351 (**Fig**  
181 **S4**) whereas all other groups had no significant difference. We also assessed for antibody-  
182 mediated innate immune effector functions. While all groups showed similar antibody-dependent  
183 neutrophil phagocytosis (ADNP) (**Fig 3C-D** and **S4**), patients receiving TNFi had decreased  
184 antibody-dependent cellular phagocytosis (ADCP) against B.1.617.2 (**Fig 3D**) and B.1.351 (**Fig**  
185 **S3**). For unexplained reasons, patients receiving anti-integrin inhibitors had enhanced ADCP  
186 against Wuhan-1 D614G (**Fig 3C**) and antibody-dependent complement fixation (ADCD)

187 against B.1.617.2 (**Fig 3D**) and B.1.351 (**Fig S4**). When we combined the data, only patients  
188 receiving TNFi showed substantive decreases in antibody effector functions at three months after  
189 second vaccination (**Fig 3E**).

190 As serum antibody titers generated by the Pfizer BNT162b2 vaccine wane over  
191 time (Israel et al., 2021; Thomas et al., 2021), we also assessed neutralizing activity at five  
192 months after immunization in CID patients (n = 39); for comparison, we used the later, six-  
193 month time point from our immunocompetent cohort (n = 24) since a five-month time point was  
194 not sampled. Sera from CID patients trended toward lower neutralizing activity against all three  
195 viruses than immunocompetent volunteers (GMT: 178 (immunocompetent) versus 117 (CID  
196 patients) [WA1/2020 D614G],  $P = 0.77$ ; 80 versus 61 [Wash-B.1.351],  $P = 0.53$ ; 102 versus 59  
197 [B.1.617.2],  $P = 0.18$ ). Sera from both patient and immunocompetent subject groups also were  
198 less efficient at neutralizing Wash-B.1.351 and B.1.617.2 than WA1/2020 D614G (**Fig 4**). While  
199 there were limited numbers of patients in each drug group at this time point, the trend of  
200 decreased inhibitory activity against Wash-B.1.351 and B.1.617.2 was seen in patients receiving  
201 TNFi, anti-integrin inhibitors, NSAIDs, anti-IL-23 inhibitor, antimetabolites, antimalarial agents,  
202 BCDT, Nrf2 activator, SSZ, and anti-BLys) (**Fig 4 and S5**). Whereas only 4 of 24 (17%)  
203 immunocompetent volunteers had neutralization titers below 1/50 at the six-month time point  
204 against B.1.617.2, 25 of 39 (54%) of CID patients fell below this postulated protective threshold  
205 at the five-month time point (**Table 2**). Patients treated with antimetabolites (40%), TNFi  
206 (100%), antimalarial agents (43%), anti-integrin inhibitors (33%), NSAIDs (33%), and anti-IL-  
207 23 inhibitors (33%) had higher percentages of individuals than healthy volunteers below the 1/50  
208 cut-off against B.1.617.2 (**Table 2**).

209

## 210 **DISCUSSION**

211 In this study, we evaluated the functional antibody responses after immunization with the  
212 Pfizer BNT162b2 mRNA vaccine against historical and emerging SARS-CoV-2 strains in a  
213 cohort of adult CID patients with a range of diagnoses and treatment interventions. These results  
214 were compared to a separate cohort of similarly vaccinated immunocompetent adults (Turner et  
215 al., 2021) and showed consistently lower serum antibody neutralizing titers in most CID patients,  
216 with a substantial fraction falling below an estimated 1/50 cutoff against B.1.617.2 (Delta) that  
217 has been proposed as a correlate of protection (Khoury et al., 2021). Subgroup analysis  
218 suggested that individuals on TNFi had lower inhibitory titers than other therapeutic groups.  
219 Thus, these patients might be at greatest risk for breakthrough infections, especially with VOC.  
220 Similarly, in studies that evaluated Fc effector function of serum antibodies, those receiving  
221 TNFi showed greater decreases in antibody effector functions, providing a second possible  
222 mechanism for risk of vaccine failure in these populations.

223 Our findings corroborate studies that report an association between patients with CID,  
224 including those on TNFi, and reduced antibody responses after vaccination (Alexander et al.,  
225 2021; Deepak et al., 2021; Fiorino et al., 2012). Poor seroconversion in these patients has been  
226 described after vaccination against hepatitis A (Park et al., 2014), hepatitis B (Haykir Solay and  
227 Eser, 2019; Pratt et al., 2018), and influenza (Cullen et al., 2012; Hua et al., 2014; Shirai et al.,  
228 2018) viruses which may be potentiated by TNFi and other immunosuppressants (Andrisani et  
229 al., 2013). Furthermore, a specific effect of TNFi on dampening antibody responses in IBD  
230 patients has been observed in those who recovered from SARS-CoV-2 infection (Dailey et al.,  
231 2021; Kennedy et al., 2021) or after vaccination (Edelman-Klapper et al., 2021). While we did  
232 observe that patients with Crohn's disease had reduced neutralization titers against B.1.617.2,

233 this was likely due to the use of TNFi rather than disease state itself. As TNF- $\alpha$  contributes to  
234 secondary lymphoid organ (B cell follicles or lymph nodes) development and signaling (Fu and  
235 Chaplin, 1999; Murphy and Weaver, 2016), TNFi may interfere with germinal center reactions  
236 and induction of optimal humoral immune responses.

237 The importance of Fc effector functions for antibody efficacy *in vivo* against SARS-CoV-2  
238 has been illustrated with several NTD and RBD mAbs in animal models of infection (Schäfer et  
239 al., 2021; Suryadevara et al., 2021; Ullah et al., 2021; Winkler et al., 2021; Yamin et al., 2021).  
240 Consistent with these results, differences in antibody effector functions in serum also are  
241 associated with distinct levels of protection in the upper and lower respiratory tract of non-  
242 human primates immunized with a recombinant SARS-CoV-2 spike glycoprotein (NVX-  
243 CoV2373) (Gorman et al., 2021). Moreover, the BNT162b2 and mRNA1273 mRNA vaccines  
244 appear to induce different functional profiles in humans with higher RBD- and NTD-specific  
245 IgA, as well as functional antibodies (ADNP and ADNK) seen in mRNA-1273 vaccine  
246 recipients (Kaplonek et al., 2021). Thus, and independent of the lower neutralizing antibody  
247 levels observed in the sera of CID patients treated with TNFi, diminished Fc effector function  
248 profiles also could contribute to a higher frequency of breakthrough infections in this and other  
249 immunosuppressed vaccinated populations (Hall et al., 2021; Kamar et al., 2021; Qin et al.,  
250 2021).

251 The lower serological responses to the BNT162b2 vaccine seen in many of the CID patients  
252 in our cohort appears worse against the two viruses with spike genes of B.1.351 and B.1.617.2.  
253 This was not unexpected given that the evolution of more transmissible SARS-CoV-2 VOC with  
254 substitutions in the spike protein impacts antibody binding. Indeed, neutralization by vaccine-  
255 induced sera is diminished against variants expressing mutations in the spike gene at positions

256 L452, E484, and elsewhere (Chen et al., 2021b; McCallum et al., 2021; Tada et al., 2021; Wang  
257 et al., 2021a; Wang et al., 2021b; Wibmer et al., 2021). Moreover, several vaccines have shown  
258 reduced ability to prevent symptomatic infection caused by the B.1.351 and B.1.617.2 variants in  
259 humans (Lopez Bernal et al., 2021; Madhi et al., 2021; Sadoff et al., 2021; Shinde et al., 2021).  
260 The lower functional (neutralizing and Fc effector functions) antibody responses seen in  
261 immunized immunosuppressed CID patients combined with inherently less inhibitory activity  
262 against emerging variants is consistent with the recent recommendation to administer an  
263 additional dose of vaccine to these at-risk populations. In addition, our data suggest that those  
264 receiving TNFi in particular should be further prioritized for an added vaccine dose and may  
265 require additional considerations such as temporary holding of immunosuppressive medication to  
266 optimize induction of protective immune responses.

267 **Limitations of study.** We note several limitations in our study. (1) Due to the diversity  
268 of immunosuppressants used, the number in each treatment subgroup is relatively small, limiting  
269 the power of the statistical analysis; (2) The cohort we used was a subset of a larger CID cohort  
270 (Deepak et al., 2021) that included vaccinated patients receiving multiple immunosuppressive  
271 treatment modalities. Only those on monotherapy regimens were evaluated in our study to  
272 eliminate confounding by use of concomitant immunosuppressive agents; (3) We grouped  
273 subjects by treatment intervention but due to the small numbers did not account for underlying  
274 disease severity nor diagnosis, which independently could impact immune responses; (4) Our  
275 study focused on subjects immunized with the Pfizer BNT162b2 mRNA vaccine. Separate  
276 studies are needed with other vaccine platforms; (5) Our studies focused on the impact of  
277 immunosuppression on serum antibody responses after vaccination and did not account for T cell

278 and anamnestic responses, which also may confer protection; and (6) The small sample size  
279 precluded assessment of comorbidities, age, and sex on humoral responses.

280 From a cohort of 74 patients with chronic inflammatory diseases on different  
281 immunosuppressive therapy, we observed a clear trend towards lower antibody neutralizing and  
282 Fc effector function responses after two doses of Pfizer BNT162b2 mRNA vaccination in those  
283 receiving TNFi. As these responses are even lower against emerging VOC, boosting and  
284 functional monitoring of immunity will be important in these individuals. Future studies are  
285 warranted to understand and improve SARS-CoV-2 immunity in this and other immunologically  
286 vulnerable populations.

## 287 **ACKNOWLEDGEMENTS**

288           This study was supported by grants and contracts from NIH (R01 AI157155,  
289 R01AI151178, HHSN75N93019C00074, NIAID Centers of Excellence for Influenza Research  
290 and Response (CEIRR) contracts HHSN272201400008C and 75N93021C00014, and the  
291 Collaborative Influenza Vaccine Innovation Centers (CIVIC) contract 75N93019C00051). The  
292 Alter laboratory was supported by the Ragon Institute, the Massachusetts Consortium on  
293 Pathogen Readiness (MassCPR), the NIH (3R37AI080289-11S1, R01AI146785, U19AI42790,  
294 U19AI135995, U19AI42790, 1U01CA260476, CIVIC75N93019C00052), the Gates foundation  
295 Global Health Vaccine Accelerator Platform funding (OPP1146996 and INV-001650), and the  
296 Musk Foundation. M.P. was supported by the Scientist Development Award from the  
297 Rheumatology Research Foundation. P.D. is supported by a Junior Faculty Development Award  
298 from the American College of Gastroenterology and IBD Plexus of the Crohn's & Colitis  
299 Foundation. A.H.J.K. is supported by the Rheumatology Research Foundation, NIH/NIAMS P30  
300 AR073752, and PCORI SDM2017C28224. G.F.W. was supported by grant funding from the  
301 NIH (R01 NS106289) and the NMSS (RG-1802-30253). The COVaRiPAD study was supported  
302 by The Leona M. and Harry B. Helmsley Charitable Trust, Washington University Digestive  
303 Disease Research Core Center (NIDDK P30DK052574), Washington University Rheumatic  
304 Diseases Research Resource-Based Center (NIAMS P30AR073752), the Judy Miniace Research  
305 Fund for the Washington University Lupus Clinic, the Siteman Cancer Center grant  
306 P30CA091842 from the NIH/NCI, and the Washington University Institute of Clinical and  
307 Translational Sciences grant UL1TR002345 from the NIH/NCATS. We thank Richard Webby  
308 and Pei-Yong Shi for some of the viruses used in this study and Kimberly E. Taylor at University  
309 of California, San Francisco for statistical support.

310

## 311 **AUTHOR CONTRIBUTIONS**

312 R.E.C. performed and analyzed neutralization assays. M.J.G., D.Y., and D.Y.Z. performed  
313 and analyzed effector function analyses. J.M.C. performed and analyzed ELISA data. L.D. and  
314 S.A.H. performed and analyzed next generation sequencing of viral stocks. P.D., M.P., R.M.P.,  
315 J.A.O'H., S.C., G.F.W., A.H.E., and A.H.J.K. designed the clinical studies and provided human  
316 samples. S.B., W.K., and J.S.T. processed clinical samples. P.D., D.A.L., F.K., G.A., A.H.E.,  
317 A.H.J.K., and M.S.D. obtained funding. G.A. and M.S.D. supervised the research. R.E.C. and  
318 M.S.D. wrote the initial draft, with the other authors providing editorial comments.

319

## 320 **COMPETING FINANCIAL INTERESTS**

321 M.S.D. is a consultant for Inbios, Vir Biotechnology, and Carnival Corporation, and on  
322 the Scientific Advisory Boards of Moderna and Immunome. The Diamond laboratory has  
323 received unrelated funding support in sponsored research agreements from Vir Biotechnology,  
324 Moderna, and Emergent BioSolutions. F.K. is a coinventor on a patent application for serological  
325 assays and SARS-CoV-2 vaccines (international application numbers PCT/US2021/31110 and  
326 62/994,252). A.H.J.K. participated in consulting, advisory board, or speaker's bureau for Alexion  
327 Pharmaceuticals, Aurinia Pharmaceuticals, Exagen Diagnostics, Inc., and GlaxoSmithKline, and  
328 received unrelated funding support under a sponsored research agreement from  
329 GlaxoSmithKline. The Ellebody laboratory received funding under sponsored research  
330 agreements that are unrelated to current study from Emergent BioSolutions and from AbbVie.  
331 A.H.E. is a consultant for Mubadala Investment Company and the founder of ImmuneBio  
332 Consulting LLC. A.H.E., M.S.D., and J.S.T. are recipients of a licensing agreement with Abbvie



333 Inc., for commercial development of a SARS-CoV-2 mAb not described in this study. J.S.T. is a  
334 consultant for Gerson Lehrman Group. S.C. received research funding from Biogen and received  
335 speaking and/or consulting fees from Biogen, Novartis, Sanofi Genzyme, Genentech and Bristol  
336 Myers Squibb. P.D. has participated in consulting, advisory board, or speaker's bureau for  
337 Janssen, Pfizer, Prometheus Biosciences, Boehringer Ingelheim, AbbVie, and Arena  
338 Pharmaceuticals and received funding under an unrelated sponsored research agreement from  
339 Takeda Pharmaceutical, Arena Pharmaceuticals, Bristol Myers Squibb-Celgene, and Boehringer  
340 Ingelheim. G.F.W. has received honoraria for consulting from Novartis and Genentech, Inc., and  
341 research funding from Biogen, EMD Serono and Roche. F. K. has consulted for Merck, Curevac  
342 and Pfizer in the past and is currently consulting for Pfizer, Seqirus and Avimex. The Krammer  
343 laboratory is collaborating with Pfizer on animal models of SARS-CoV-2. G.A. is the founder of  
344 SeromYx Systems Inc., and an equity holder of Leyden Labs.

345 **FIGURE LEGENDS**

346 **Figure 1. Serum IgG titers against SARS-CoV-2 variant spike proteins at three**  
347 **months after second vaccination. (A-G)** Paired analyses of spike-specific endpoint IgG serum  
348 titers measured by ELISA from humans at three months after second vaccination with  
349 BNT162b2 mRNA vaccine. Individuals were grouped as (A) immunocompetent volunteers (n =  
350 25) and (B) CID patients (n = 45) or subdivided by immunosuppressive drug class (C) TNFi (n =  
351 8), (D) antimetabolites (n = 7), (E) antimalarials (n = 6), (F) anti-integrin inhibitors (n = 5), or  
352 (G) non-steroidal anti-inflammatory drugs (NSAIDs) (n = 4). Geometric mean titer (GMT)  
353 values are shown on graph. Dotted line represents limit of detection of the assay. One-way  
354 ANOVA with Dunnett's post-test; \*  $p < 0.05$ ; \*\*\*\*  $p < 0.0001$ . (H) Heat map of GMT values  
355 relative to healthy volunteer GMT values for each SARS-CoV-2 spike protein. Blue, reduction;  
356 red, increase.

357 **Figure 2. Serum neutralization titers against SARS-CoV-2 variant viruses at three**  
358 **months after second vaccination. (A-H)** Paired analyses of neutralization (NT<sub>50</sub>) titers in serum  
359 measured by focus reduction neutralization test (FRNT) against fully infectious SARS-CoV-2  
360 strains at three months after second vaccination with BNT162b2 mRNA vaccine. Individuals  
361 were grouped as (A) immunocompetent volunteers (n = 25) and (B) CID patients (n = 74) or  
362 subdivided by immunosuppressive drug class (C) antimetabolites (n = 12), (D) TNFi (n = 11),  
363 (E) antimalarials (n = 8), (F) anti-integrin inhibitors (n = 9), (G) NSAIDs (n = 9), or (H) anti-IL-  
364 23 inhibitors (n = 9). GMT values are shown on graph. Dotted line represents limit of detection  
365 of the assay. One way ANOVA with Dunn's post-test; \*  $p < 0.05$ ; \*\*  $p < 0.01$ ; \*\*\*  $p < 0.001$ ;  
366 \*\*\*\*  $p < 0.0001$ . (I) Heat map of GMT values relative to healthy volunteer GMT values for each  
367 SARS-CoV-2 spike protein. Blue, reduction; red, increase.

368 **Figure 3. Effector functions against SARS-CoV-2 variant viruses at three months**  
369 **after second vaccination.** Serum from humans at three months after second vaccination with  
370 BNT162b2 mRNA vaccine were assayed for (A-B) Total IgG, IgG subclasses (IgG1, IgG2,  
371 IgG3, IgG4, IgM), and C1q binding or (C-D) antibody-dependent cellular phagocytosis (ADCP),  
372 antibody-dependent neutrophil phagocytosis (ADNP), antibody-dependent complement  
373 deposition (ADCD), or FcγR (FcγR2A, FcγR2B, or FcγR3A) binding as measured by Luminex.  
374 Responses were measured against (A, C) Wuhan-1 D614G or (B, D) B.1.617.2. Individuals were  
375 grouped as immunocompetent volunteers (n = 25) or subdivided by immunosuppressive drug  
376 class: TNFi (n = 8), antimetabolites (n = 7), antimalarials (n = 6), or anti-integrin inhibitors (n =  
377 5). One-way ANOVA with Dunnett's post-test; \*  $p < 0.05$ ; \*\*  $p < 0.01$ ; \*\*\*  $p < 0.001$ . (E)  
378 Composite polar plots depicting shifted z-score only median of antibody titer, FcγR binding, and  
379 antibody function against Wuhan-1 D614G, B.1.351, and B.1.617.2 for each group.

380 **Figure 4. Serum neutralization titers of CID patients against SARS-CoV-2 variant**  
381 **viruses at five months after second vaccination.** (A-H) Paired analyses of neutralization  
382 (NT<sub>50</sub>) titers in serum measured by FRNT against fully infectious SARS-CoV-2 strains from  
383 humans at five (CID patients) or six (immunocompetent volunteers) months after second  
384 vaccination with BNT162b2 mRNA vaccine; different time points were used based on variability  
385 of the separate study designs and availability of samples. Individuals were grouped as (A)  
386 immunocompetent volunteers (n = 24) (B) CID patients (n = 39) or subdivided by  
387 immunosuppressive drug class (C) antimetabolites (n = 5), (D) TNFi (n = 3), (E) antimalarials (n  
388 = 7), (F) anti-integrin inhibitors (n = 3), (G) NSAIDs (n = 5), (H) anti-IL-23 inhibitors (n = 3) or  
389 (I) B cell depletion therapy (BCDT) (n = 3). GMT values are shown on graph. Dotted line  
390 represents limit of detection of the assay. One way ANOVA with Dunn's post-test; \*  $p < 0.05$ ;

391 \*\*  $p < 0.01$ ; \*\*\*  $p < 0.001$ ; \*\*\*\*  $p < 0.0001$ . (J) Heat map of GMT values relative to healthy  
392 volunteer GMT values for each SARS-CoV-2 spike protein. Blue, reduction; red, increase.  
393

394 **SUPPLEMENTAL FIGURE LEGENDS**

395 **Figure S1. Serum IgG titers against SARS-CoV-2 variant spike proteins at three**  
396 **months after second vaccination, small n.** Paired analyses of spike-specific endpoint IgG  
397 serum titers measured by ELISA from humans at three months after second vaccination with  
398 BNT162b2 mRNA vaccine. Individuals were grouped by immunosuppressive drug class: anti-  
399 IL-23 inhibitors, B cell depletion therapy (BCDT), Bruton's tyrosine kinase inhibitor (BTKi),  
400 nuclear factor erythroid-2-related factor 2 (Nrf2) activator, sulfasalazine (SSZ), systemic steroid,  
401 anti-B lymphocyte stimulator (anti-BLyS), and sphingosine 1-phosphate receptor modulator  
402 (S1PR mod). GMT values are shown on graph. Dotted line represents limit of detection of the  
403 assay.

404 **Figure S2. Serum neutralization titers against SARS-CoV-2 variant viruses at three**  
405 **months after second vaccination, small n.** Paired analyses of neutralization (NT<sub>50</sub>) titers in  
406 serum measured by FRNT from humans at three months after second vaccination with  
407 BNT162b2 mRNA vaccine. Individuals were grouped by immunosuppressive drug class: B cell  
408 depletion therapy (BCDT), Bruton's tyrosine kinase inhibitor (BTKi), nuclear factor erythroid-2-  
409 related factor 2 (Nrf2) activator, sulfasalazine (SSZ), systemic steroid, anti-B lymphocyte  
410 stimulator (anti-BLyS), and sphingosine 1-phosphate receptor modulator (S1PR mod). GMT  
411 values are shown on graph. Dotted line represents limit of detection of the assay.

412 **Figure S3. Serum neutralization titers against SARS-CoV-2 variant viruses at three**  
413 **months after second vaccination by CID classification. (Left)** Paired analyses of neutralization  
414 (NT<sub>50</sub>) titers in serum measured by FRNT from humans at three months after second vaccination  
415 with BNT162b2 mRNA vaccine. Individuals were grouped by CID diagnosis: Crohn's disease,  
416 ulcerative colitis, systemic lupus erythematosus, Sjogren's syndrome, rheumatoid arthritis,

417 asthma, and multiple sclerosis. Crohn's disease patients were further divided by treatment with  
418 or without anti-TNF- $\alpha$  inhibitors. GMT values are shown on graph. Dotted line represents limit  
419 of detection of the assay. One way ANOVA with Dunn's post-test; \*  $p < 0.05$ ; \*\*  $p < 0.01$ ; \*\*\*  $p$   
420  $< 0.001$ ; \*\*\*\*  $p < 0.0001$ . (**Right**) Table with number (or percentage) of patients with NT<sub>50</sub>  
421 values below 1/50 for each group against WA1/2020 D614G, Wash-B.1.351, and B.1.617.2.

422 **Figure S4. Effector functions against SARS-CoV-2 variant viruses at three months**  
423 **after second vaccination against B.1.351.** Serum from humans at three months after second  
424 vaccination with BNT162b2 mRNA vaccine were assayed for Total IgG, IgG subclasses (IgG1,  
425 IgG2, IgG3, IgG4, IgM), C1q binding, antibody-dependent cellular phagocytosis (ADCP),  
426 antibody-dependent neutrophil phagocytosis (ADNP), antibody-dependent complement  
427 deposition (ADCD), or Fc $\gamma$ R (Fc $\gamma$ R2A, Fc $\gamma$ R2B, or Fc $\gamma$ R3A) binding as measured by Luminex.  
428 Responses were measured against B.1.351. Individuals were grouped as immunocompetent  
429 volunteers (n = 25) or subdivided by immunosuppressive drug class: TNFi (n = 8),  
430 antimetabolites (n = 7), antimalarials (n = 6), or anti-integrin inhibitors (n = 5). One-way  
431 ANOVA with Dunnett's post- test; \*  $p < 0.05$ ; \*\*  $p < 0.01$ .

432 **Figure S5. Serum neutralization titers of CID patients against SARS-CoV-2 variant**  
433 **viruses at five months after second vaccination, small n.** Paired analyses of neutralization  
434 (NT<sub>50</sub>) titers in serum measured by FRNT from humans at five months after second vaccination  
435 with BNT162b2 mRNA vaccine. Individuals were grouped by immunosuppressive drug class:  
436 nuclear factor erythroid-2-related factor 2 (Nrf2) activator, sulfasalazine (SSZ), anti-B  
437 lymphocyte stimulator (anti-BLyS), Bruton's tyrosine kinase inhibitor (BTKi), systemic steroid,  
438 and sphingosine 1-phosphate receptor modulator (S1PR mod). GMT values are shown on graph.  
439 Dotted line represents limit of detection of the assay.

440 **STAR METHODS**

441 **RESOURCE AVAILABILITY**

442 **Lead Contact.** Further information and requests for resources and reagents should be  
443 directed to the Lead Contact, Michael S. Diamond ([diamond@wusm.wustl.edu](mailto:diamond@wusm.wustl.edu)).

444 **Materials Availability.** All requests for resources and reagents should be directed to the  
445 Lead Contact author. This includes mice and viruses. All reagents will be made available on  
446 request after completion of a Materials Transfer Agreement.

447 **Data and code availability.** All data supporting the findings of this study are available  
448 within the paper and are available from the corresponding author upon request.

449

450 **EXPERIMENTAL MODEL AND SUBJECT DETAILS**

451 **Patient samples.** CID patient samples were obtained from the COVaRiPAD longitudinal  
452 observational study as previously described (Deepak et al., 2021). Immunocompetent volunteer  
453 samples were obtained as previously described (Turner et al., 2021). All individuals were  
454 enrolled at Washington University School of Medicine in studies that had received Institutional  
455 Review Board approval (202012081 (WU368) and 202012084 (COVaRiPAD)).

456 **Cells.** Vero-TMPRSS2 cells (Zang et al., 2020) were cultured at 37°C in Dulbecco's  
457 Modified Eagle medium (DMEM) supplemented with 10% fetal bovine serum (FBS), 10 μM  
458 HEPES pH 7.3, 1 mM sodium pyruvate, 1× non-essential amino acids, and 100 U/ml of  
459 penicillin–streptomycin, and 5 μg/mL of blasticidin.

460 **Viruses.** The WA1/2020 D614G recombinant strain was obtained from an infectious  
461 cDNA clone of the 2019n-CoV/USA\_WA1/2020 strain as described previously (Plante et al.,  
462 2021). The Beta (B.1.351) variant spike gene was introduced into the WA1/2020 backbone as

463 described previously (Chen et al., 2021b). The B.1.617.2 isolate was obtained a gift from R.  
464 Webby (Memphis, TN). All viruses were passaged once in Vero-TMPRSS2 cells and subjected  
465 to next-generation sequencing after RNA extraction to confirm the introduction and stability of  
466 substitutions (**Table S1**). All virus experiments were performed in an approved Biosafety level 3  
467 (BSL-3) facility.

468

## 469 **METHOD DETAILS**

470 **Enzyme-linked immunosorbent assay (ELISA).** Serum antibodies against SARS-CoV-  
471 2 spike (S) were measured as previously described (Amanat et al., 2020; Stadlbauer et al., 2020).  
472 Briefly, polystyrene 96-well plates (Immulon 4HBX; Thermo Fisher Scientific) were coated with  
473 50  $\mu$ L/well of PBS (pH 7.4) (Gibco) containing recombinant spike proteins (2  $\mu$ g/mL) and  
474 incubated at 4°C overnight. On the next day, plates were washed with PBS-0.1% Tween 20  
475 (PBS-T) using an automated plate washer (AquaMax 2000; Molecular Devices). Plates were  
476 blocked with 220  $\mu$ L/well of PBS-T, 3% nonfat dry milk (AmericanBio) for 1 h. For serum and  
477 secondary antibody dilutions, a solution of PBS-T, 1% nonfat dry milk (AmericanBio) was used.  
478 Sera were serially diluted (3-fold) starting at a 1:100 dilution. Dilutions were added to the plates  
479 (100  $\mu$ L/well) for 2 h at room temperature (RT). Plates were washed, and the secondary  
480 antibody IgG (whole molecule)-peroxidase antibody was added for 1 h at room temperature.  
481 Plates were washed, and the substrate *o*-phenylenediamine dihydrochloride (SigmaFast OPD;  
482 Sigma-Aldrich) was added (100  $\mu$ L/well) and incubated for 10 min. The reaction was stopped  
483 by addition of 50  $\mu$ L/well of a 3 M HCl solution (Thermo Fisher Scientific). Optical density  
484 (OD) was measured (490 nm) using a microplate reader (Synergy H1; BioTek). Analysis was



485 performed using Prism 7 software (GraphPad), and values were reported as area under the curve  
486 (AUC).

487 **Focus reduction neutralization test.** Serial dilutions of mAbs or sera were incubated  
488 with  $10^2$  focus-forming units (FFU) of different strains or variants of SARS-CoV-2 for 1 h at  
489 37°C. Antibody-virus complexes were added to Vero-TMPRSS2 cell monolayers in 96-well  
490 plates and incubated at 37°C for 1 h. Subsequently, cells were overlaid with 1% (w/v)  
491 methylcellulose in MEM supplemented with 2% FBS. Plates were harvested 24 h later by  
492 removing overlays and fixed with 4% PFA in PBS for 20 min at room temperature. Plates were  
493 washed and sequentially incubated with an oligoclonal pool of SARS2-2, SARS2-11, SARS2-16,  
494 SARS2-31, SARS2-38, SARS2-57, and SARS2-71 (Liu et al., 2021d; VanBlargan et al.) anti-  
495 spike antibodies and HRP-conjugated goat anti-mouse IgG (Sigma, 12-349) in PBS  
496 supplemented with 0.1% saponin and 0.1% bovine serum albumin. SARS-CoV-2-infected cell  
497 foci were visualized using TrueBlue peroxidase substrate (KPL) and quantitated on an  
498 ImmunoSpot microanalyzer (Cellular Technologies).

499 **Effector function antigens.** Antigens used for Luminex based assays: SARS-CoV-2  
500 D614G, Beta B.1.351, and Delta B.1.617.2 spike antigens all were kindly provided by Erica  
501 Ollmann Saphire (La Jolla Institute for Immunology).

502 **Luminex profiling.** Serum samples were analyzed by customized Luminex assay to  
503 quantify the relative concentration of antigen-specific antibody isotypes, subclasses, and Fcγ-  
504 receptor (FcγR) binding profiles, as previously described (Brown et al., 2017; Brown et al.,  
505 2012). Briefly, SARS-CoV-2 antigens were used to profile specific humoral immune responses.  
506 Antigens were coupled to magnetic Luminex beads (Luminex Corp) by carbodiimide-NHS ester-  
507 coupling (Thermo Fisher). Antigen-coupled microspheres were washed and incubated with

508 plasma or serum samples at an appropriate sample dilution (1:5000 for IgG1 and all low affinity  
509 Fc $\gamma$ R, and 1:200 for all other readouts) for 2 h at 37°C in 384-well plates (Greiner Bio-One).  
510 Unbound antibodies were washed away, and antigen-bound antibodies were detected by using a  
511 PE-coupled detection antibody for each subclass and isotype (IgG1, IgG3, IgA1, and IgM;  
512 Southern Biotech), and Fc $\gamma$ R were fluorescently labeled with PE before addition to immune  
513 complexes (Fc $\gamma$ R2a, Fc $\gamma$ R3a; Duke Protein Production facility). After one hour of incubation,  
514 plates were washed, and flow cytometry was performed with an iQue (Intellicyt) and analyzed  
515 using IntelliCyt ForeCyt (v8.1). PE median fluorescent intensity (MFI) is reported as a readout  
516 for antigen-specific antibody titers.

517 **Antibody-dependent complement deposition (ADCD)** Antibody-dependent  
518 complement deposition (ADCD) was conducted as previously described (Fischinger et al., 2019).  
519 Briefly, SARS-CoV-2 antigens were coupled to magnetic Luminex beads (Luminex Corp) by  
520 carbodiimide-NHS ester-coupling (Thermo Fisher). Coupled beads were incubated for 2 h at  
521 37°C with serum samples (1:10 dilution) to form immune complexes and then washed to remove  
522 unbound immunoglobulins. To measure antibody-dependent deposition of C3, lyophilized  
523 guinea pig complement (Cedarlane) was diluted in gelatin veronal buffer with calcium and  
524 magnesium (GBV++) (Boston BioProducts) and added to immune complexes. Subsequently, C3  
525 was detected with an anti-C3 fluorescein-conjugated goat IgG fraction detection antibody  
526 (Mpbio). Flow cytometry was performed 5 Laser LSR Fortessa Flow Cytometer and analyzed  
527 using FlowJo V10.7.1. ADCD was reported as the median of C3 deposition.

528 **Antibody-dependent cellular (ADCP) and neutrophil (ADNP) phagocytosis.**  
529 Antibody-dependent cellular phagocytosis (ADCP) and antibody-dependent neutrophil  
530 phagocytosis (ADNP) were conducted according to the previously described protocols (Butler et

531 al., 2019; Karsten et al., 2019). In detail, SARS-CoV-2 antigens were biotinylated using EDC  
532 (Thermo Fisher) and Sulfo-NHS-LCLC biotin (Thermo Fisher) and coupled to yellow-green  
533 (505/515) fluorescent Neutravidinconjugated beads (Thermo Fisher), respectively. To form  
534 immune complexes, antigen-coupled beads were incubated for 2 h at 37°C with 1:100 diluted  
535 serum samples and then washed to remove unbound immunoglobulins. For ADCP, the immune  
536 complexes were incubated for 16–18 hours with THP-1 cells ( $1.25 \times 10^5$  THP-1 cells/mL) and for  
537 ADNP for 1 hour with RBC-lyzed whole blood. Following the incubation, cells were fixed with  
538 4% PFA. For ADNP, RBC-lyzed whole blood was washed, stained for CD66b<sup>+</sup> (Biolegend) to  
539 identify neutrophils, and then fixed in 4% PFA. Flow cytometry was performed to identify the  
540 percentage of cells that had phagocytosed beads as well as the number of beads that had been  
541 phagocytosis (phagocytosis score = % positive cells  $\times$  Median Fluorescent Intensity of positive  
542 cells/10000). Flow cytometry was performed with 5 Laser LSR Fortessa Flow Cytometer and  
543 analyzed using FlowJo V10.7.1.

544

## 545 **QUANTIFICATION AND STATISTICAL ANALYSIS**

546 Statistical significance was assigned when *P* values were < 0.05 using Prism Version 8  
547 (GraphPad). Specific tests (one-way ANOVA with Dunn’s or Dunnett’s post-test for multiple  
548 comparisons), number of subjects (n), geometric mean values, and comparison groups are  
549 indicated in the Figure legends. All data were graphed and analyzed in GraphPad Prism v8.4.3.  
550 The data used to generate **Fig 3e** was graphed and analyzed using Python version 3.8.5 and the  
551 ‘plotly’ package (Sievert, 2020). For each feature, data was first standardized by computing the  
552 Z-score, scaling values to zero mean and unit variance. The median resulting values are  
553 represented on each polar plot. All other data were graphed and analyzed in GraphPad Prism

554 v8.4.3. Tobit linear regression was performed using Stata/MP 13.1, and the effects were refined  
555 to account for left-censoring of data below the limit of detection (LoD).

556 **Table 1. Patient characteristics**

|     |                                                 | <b>Total N=74</b> |
|-----|-------------------------------------------------|-------------------|
|     |                                                 | <b>N (%)</b>      |
| 558 |                                                 |                   |
| 559 |                                                 |                   |
| 560 | <b>Age (median [range])</b>                     | 48 (22-82)        |
| 561 |                                                 |                   |
| 562 | <b>Sex</b>                                      |                   |
| 563 | Female                                          | 52 (70)           |
| 564 | Male                                            | 21 (28)           |
| 565 | Other                                           | 1 (1)             |
| 566 |                                                 |                   |
| 567 | <b>Race</b>                                     |                   |
| 568 | White                                           | 66 (89)           |
| 569 | Black                                           | 5 (7)             |
| 570 | Multiple Race                                   | 2 (3)             |
| 571 | Asian                                           | 1 (1)             |
| 572 |                                                 |                   |
| 573 | <b>Chronic inflammatory disease<sup>a</sup></b> |                   |
| 574 | Alopecia Areata                                 | 1 (1)             |
| 575 | ANCA Associated Vasculitis                      | 1 (1)             |
| 576 | Ankylosing Spondylitis                          | 2 (3)             |
| 577 | Asthma                                          | 6 (8)             |
| 578 | Combined Variable Immune Deficiency             | 2 (3)             |
| 579 | Crohn's Disease                                 | 31 (42)           |
| 580 | Hashimoto's Disease                             | 5 (7)             |
| 581 | IBD Associated Arthritis                        | 1 (1)             |
| 582 | Inflammatory Arthritis                          | 1 (1)             |
| 583 | Multiple Sclerosis                              | 10 (14)           |
| 584 | Psoriasis                                       | 4 (5)             |
| 585 | Psoriatic Arthritis                             | 1 (1)             |
| 586 | Rheumatoid Arthritis                            | 8 (11)            |
| 587 | Scleroderma                                     | 1 (1)             |
| 588 | Sjogren's Syndrome                              | 5 (7)             |
| 589 | Systemic Lupus Erythematosus                    | 5 (7)             |
| 590 | Type 1 Diabetes                                 | 4 (5)             |
| 591 | Ulcerative Colitis                              | 5 (7)             |
| 592 | Uveitis                                         | 1 (1)             |
| 593 | Other                                           | 2 (3)             |
| 594 |                                                 |                   |
| 595 |                                                 |                   |
| 596 |                                                 |                   |
| 597 |                                                 |                   |

598 <sup>a</sup> Patients may have more than one disease diagnosis.

599

600

601  
 602 **Table 2. Number (and percentage) of individuals with neutralization titers (NT<sub>50</sub>) values**  
 603 **below 1/50.**  
 604

| Class                         | # (%) 3 months after 2nd vaccination<br>below NT <sub>50</sub> of 1/50 |                   |                  |           | # (%) 5 <sup>a</sup> or 6 <sup>b</sup> months after 2nd vaccination<br>NT <sub>50</sub> of 1/50 |                   |                  |           |
|-------------------------------|------------------------------------------------------------------------|-------------------|------------------|-----------|-------------------------------------------------------------------------------------------------|-------------------|------------------|-----------|
|                               | Total                                                                  | WA1/2020<br>D614G | Wash-<br>B.1.351 | B.1.617.2 | Total                                                                                           | WA1/2020<br>D614G | Wash-<br>B.1.351 | B.1.617.2 |
| Immunocompetent<br>volunteers | 25                                                                     | 0 (0)             | 4 (16)           | 2 (8)     | 24                                                                                              | 0 (0)             | 5 (22)           | 4 (17)    |
| CID patients                  | 74                                                                     | 16 (19)           | 29 (34)          | 30 (35)   | 39                                                                                              | 13 (28)           | 22 (51)          | 25 (54)   |
| Antimetabolites               | 12                                                                     | 2 (17)            | 5 (42)           | 4 (33)    | 5                                                                                               | 2 (40)            | 2 (40)           | 2 (40)    |
| Anti-TNF- $\alpha$            | 11                                                                     | 3 (27)            | 7 (64)           | 7 (64)    | 3                                                                                               | 2 (67)            | 2 (67)           | 3 (100)   |
| Antimalarials                 | 10                                                                     | 0 (0)             | 1 (10)           | 3 (30)    | 7                                                                                               | 1 (14)            | 4 (57)           | 3 (43)    |
| Anti-integrin                 | 10                                                                     | 0 (0)             | 1 (10)           | 0 (0)     | 3                                                                                               | 0 (0)             | 0 (0)            | 1 (33)    |
| NSAIDs                        | 9                                                                      | 1 (11)            | 1 (11)           | 1 (11)    | 5                                                                                               | 1 (20)            | 2 (40)           | 2 (40)    |
| Anti-IL-23                    | 9                                                                      | 1 (11)            | 2 (22)           | 2 (22)    | 3                                                                                               | 0 (0)             | 1 (33)           | 1 (33)    |

605  
 606 <sup>a</sup> CID patient samples were collected at 5 months post completion of vaccination.

607 <sup>b</sup> Immunocompetent volunteer samples were collected at 6 months post completion of  
 608 vaccination.

609  
 610

611 **Table 3. Regression analysis of effects on serum neutralization titers against B.1.617.2**  
612 **infection**  
613

|                 | <b>Log<sub>10</sub><br/>titer</b> | <b>95% CI</b>      | <b><i>p</i>-value</b> |
|-----------------|-----------------------------------|--------------------|-----------------------|
| TNFi            | -0.3318                           | -0.6231 to -0.0406 | 0.026                 |
| Crohn's disease | -0.0592                           | -0.3229 to 0.2046  | 0.657                 |

614  
615 Multivariate tobit linear regression modeling was performed to examine the strength and  
616 independence of the association of TNFi and Crohn's disease with neutralization titers to  
617 B.1.617.2.  
618

619 **REFERENCES**

620

621 Abu-Raddad, L.J., Chemaitelly, H., and Butt, A.A. (2021). Effectiveness of the BNT162b2  
622 Covid-19 Vaccine against the B.1.1.7 and B.1.351 Variants. *N Engl J Med* 385, 187-189.

623

624 Alexander, J.L., Moran, G.W., Gaya, D.R., Raine, T., Hart, A., Kennedy, N.A., Lindsay, J.O.,  
625 MacDonald, J., Segal, J.P., Sebastian, S., *et al.* (2021). SARS-CoV-2 vaccination for patients  
626 with inflammatory bowel disease: a British Society of Gastroenterology Inflammatory Bowel  
627 Disease section and IBD Clinical Research Group position statement. *Lancet Gastroenterol*  
628 *Hepatol* 6, 218-224.

629

630 Amanat, F., Stadlbauer, D., Strohmeier, S., Nguyen, T.H.O., Chromikova, V., McMahon, M.,  
631 Jiang, K., Arunkumar, G.A., Jurczynszak, D., Polanco, J., *et al.* (2020). A serological assay to  
632 detect SARS-CoV-2 seroconversion in humans. *Nature Medicine* 26, 1033-1036.

633

634 Andrisani, G., Frasca, D., Romero, M., Armuzzi, A., Felice, C., Marzo, M., Pugliese, D., Papa,  
635 A., Mocci, G., De Vitis, I., *et al.* (2013). Immune response to influenza A/H1N1 vaccine in  
636 inflammatory bowel disease patients treated with anti TNF- $\alpha$  agents: Effects of combined  
637 therapy with immunosuppressants. *Journal of Crohn's and Colitis* 7, 301-307.

638

639 Brown, E.P., Dowell, K.G., Boesch, A.W., Normandin, E., Mahan, A.E., Chu, T., Barouch,  
640 D.H., Bailey-Kellogg, C., Alter, G., and Ackerman, M.E. (2017). Multiplexed Fc array for  
641 evaluation of antigen-specific antibody effector profiles. *J Immunol Methods* 443, 33-44.

642

643 Brown, E.P., Licht, A.F., Dugast, A.-S., Choi, I., Bailey-Kellogg, C., Alter, G., and Ackerman,  
644 M.E. (2012). High-throughput, multiplexed IgG subclassing of antigen-specific antibodies from  
645 clinical samples. *J Immunol Methods* 386, 117-123.

646

647 Butler, A.L., Fallon, J.K., and Alter, G. (2019). A Sample-Sparing Multiplexed ADCP Assay.  
648 *Frontiers in immunology* 10, 1851-1851.

649

650 Cao, Y., Su, B., Guo, X., Sun, W., Deng, Y., Bao, L., Zhu, Q., Zhang, X., Zheng, Y., Geng, C.,  
651 *et al.* (2020). Potent neutralizing antibodies against SARS-CoV-2 identified by high-throughput  
652 single-cell sequencing of convalescent patients' B cells. *Cell* 182, 73-84.

653

654 Case, J.B., Winkler, E.S., Errico, J.M., and Diamond, M.S. (2021). On the road to ending the  
655 COVID-19 pandemic: Are we there yet? *Virology* 557, 70-85.

656

657 Chan, C.E.Z., Seah, S.G.K., Chye, H., Massey, S., Torres, M., Lim, A.P.C., Wong, S.K.K., Neo,  
658 J.J.Y., Wong, P.S., Lim, J.H., *et al.* (2021). The Fc-mediated effector functions of a potent  
659 SARS-CoV-2 neutralizing antibody, SC31, isolated from an early convalescent COVID-19  
660 patient, are essential for the optimal therapeutic efficacy of the antibody. *PLoS One* 16,  
661 e0253487.

662

663 Chemaitelly, H., Yassine, H.M., Benslimane, F.M., Al Khatib, H.A., Tang, P., Hasan, M.R.,  
664 Malek, J.A., Coyle, P., Ayoub, H.H., Al Kanaani, Z., *et al.* (2021). mRNA-1273 COVID-19



665 vaccine effectiveness against the B.1.1.7 and B.1.351 variants and severe COVID-19 disease in  
666 Qatar. *Nature Medicine*.  
667  
668 Chen, R.E., Winkler, E.S., Case, J.B., Aziati, I.D., Bricker, T.L., Joshi, A., Darling, T.L., Ying,  
669 B., Errico, J.M., Shrihari, S., *et al.* (2021a). In vivo monoclonal antibody efficacy against SARS-  
670 CoV-2 variant strains. *Nature* 596, 103-108.  
671  
672 Chen, R.E., Zhang, X., Case, J.B., Winkler, E.S., Liu, Y., VanBlargan, L.A., Liu, J., Errico, J.M.,  
673 Xie, X., Suryadevara, N., *et al.* (2021b). Resistance of SARS-CoV-2 variants to neutralization by  
674 monoclonal and serum-derived polyclonal antibodies. *Nat Med* 27, 717-726.  
675  
676 Choi, B., Choudhary, M.C., Regan, J., Sparks, J.A., Padera, R.F., Qiu, X., Solomon, I.H., Kuo,  
677 H.H., Boucau, J., Bowman, K., *et al.* (2020). Persistence and Evolution of SARS-CoV-2 in an  
678 Immunocompromised Host. *N Engl J Med* 383, 2291-2293.  
679  
680 Clark, S.A., Clark, L.E., Pan, J., Coscia, A., McKay, L.G.A., Shankar, S., Johnson, R.I., Brusica,  
681 V., Choudhary, M.C., Regan, J., *et al.* (2021). SARS-CoV-2 evolution in an  
682 immunocompromised host reveals shared neutralization escape mechanisms. *Cell* 184, 2605-  
683 2617.e2618.  
684  
685 Corbett, K.S., Nason, M.C., Flach, B., Gagne, M., O'Connell, S., Johnston, T.S., Shah, S.N.,  
686 Edara, V.V., Floyd, K., Lai, L., *et al.* (2021a). Immune correlates of protection by mRNA-1273  
687 vaccine against SARS-CoV-2 in nonhuman primates. *Science*, eabj0299.  
688  
689 Corbett, K.S., Werner, A.P., Connell, S.O., Gagne, M., Lai, L., Moliva, J.I., Flynn, B., Choi, A.,  
690 Koch, M., Foulds, K.E., *et al.* (2021b). mRNA-1273 protects against SARS-CoV-2 beta  
691 infection in nonhuman primates. *Nature Immunology*.  
692  
693 Cullen, G., Bader, C., Korzenik, J.R., and Sands, B.E. (2012). Serological response to the 2009  
694 H1N1 influenza vaccination in patients with inflammatory bowel disease. *Gut* 61, 385-391.  
695 Dailey, J., Kozhaya, L., Dogan, M., Hopkins, D., Lapin, B., Herbst, K., Brimacombe, M.,  
696 Grandonico, K., Karabacak, F., Schreiber, J., *et al.* (2021). Antibody Responses to SARS-CoV-2  
697 after Infection or Vaccination in Children and Young Adults with Inflammatory Bowel Disease.  
698 medRxiv, 2021.2006.2012.21258810.  
699  
700 Deepak, P., Kim, W., Paley, M.A., Yang, M., Carvidi, A.B., Demissie, E.G., El-Qunni, A.A.,  
701 Haile, A., Huang, K., Kinnett, B., *et al.* (2021). Effect of Immunosuppression on the  
702 Immunogenicity of mRNA Vaccines to SARS-CoV-2 : A Prospective Cohort Study. *Ann Intern*  
703 *Med*.  
704  
705 Edelman-Klapper, H., Zittan, E., Shitrit, A.B.-G., Rabinowitz, K.M., Goren, I., Avni-Biron, I.,  
706 Ollech, J.E., Lichtenstein, L., Banai-Eran, H., Yanai, H., *et al.* (2021). Decreased Immune  
707 Response to COVID-19 mRNA Vaccine in Patients with Inflammatory Bowel Diseases Treated  
708 with Anti TNF $\alpha$ . medRxiv, 2021.2008.2022.21262263.  
709

- 710 Fiorino, G., Peyrin-Biroulet, L., Naccarato, P., Szabò, H., Sociale, O.R., Vetrano, S., Fries, W.,  
711 Montanelli, A., Repici, A., Malesci, A., *et al.* (2012). Effects of immunosuppression on immune  
712 response to pneumococcal vaccine in inflammatory bowel disease: a prospective study. *Inflamm*  
713 *Bowel Dis* 18, 1042-1047.
- 714
- 715 Fischinger, S., Fallon, J.K., Michell, A.R., Broge, T., Suscovich, T.J., Streeck, H., and Alter, G.  
716 (2019). A high-throughput, bead-based, antigen-specific assay to assess the ability of antibodies  
717 to induce complement activation. *J Immunol Methods* 473, 112630-112630.
- 718
- 719 Francica, J.R., Flynn, B.J., Foulds, K.E., Noe, A.T., Werner, A.P., Moore, I.N., Gagne, M.,  
720 Johnston, T.S., Tucker, C., Davis, R.L., *et al.* (2021). Protective antibodies elicited by SARS-  
721 CoV-2 spike protein vaccination are boosted in the lung after challenge in nonhuman primates.  
722 *Science Translational Medicine* 13, eabi4547.
- 723
- 724 Fu, Y.X., and Chaplin, D.D. (1999). Development and maturation of secondary lymphoid  
725 tissues. *Annu Rev Immunol* 17, 399-433.
- 726
- 727 Gorman, M.J., Patel, N., Guebre-Xabier, M., Zhu, A.L., Atyeo, C., Pullen, K.M., Loos, C., Goez-  
728 Gazi, Y., Carrion, R., Jr., Tian, J.-H., *et al.* (2021). Fab and Fc contribute to maximal protection  
729 against SARS-CoV-2 following NVX-CoV2373 subunit vaccine with Matrix-M vaccination.  
730 *Cell reports Medicine* 2, 100405-100405.
- 731
- 732 Hall, V.G., Ferreira, V.H., Ierullo, M., Ku, T., Marinelli, T., Majchrzak-Kita, B., Yousuf, A.,  
733 Kulasingam, V., Humar, A., and Kumar, D. (2021). Humoral and cellular immune response and  
734 safety of two-dose SARS-CoV-2 mRNA-1273 vaccine in solid organ transplant recipients. *Am J*  
735 *Transplant*.
- 736
- 737 Haykir Solay, A., and Eser, F. (2019). High dose hepatitis B vaccine is not effective in patients  
738 using immunomodulatory drugs: a pilot study. *Hum Vaccin Immunother* 15, 1177-1182.
- 739 Hua, C., Barnette, T., Combe, B., and Morel, J. (2014). Effect of methotrexate, anti-tumor  
740 necrosis factor  $\alpha$ , and rituximab on the immune response to influenza and pneumococcal  
741 vaccines in patients with rheumatoid arthritis: a systematic review and meta-analysis. *Arthritis*  
742 *Care Res (Hoboken)* 66, 1016-1026.
- 743
- 744 Israel, A., Shenhar, Y., Green, I., Merzon, E., Golan-Cohen, A., Schäffer, A.A., Ruppin, E.,  
745 Vinker, S., and Magen, E. (2021). Large-scale study of antibody titer decay following  
746 BNT162b2 mRNA vaccine or SARS-CoV-2 infection. *medRxiv*.
- 747
- 748 Kamar, N., Abravanel, F., Marion, O., Couat, C., Izopet, J., and Del Bello, A. (2021). Three  
749 Doses of an mRNA Covid-19 Vaccine in Solid-Organ Transplant Recipients. *N Engl J Med* 385,  
750 661-662.
- 751
- 752 Kaplonek, P., Cizmeci, D., Fischinger, S., Collier, A.R., Suscovich, T., Linde, C., Broge, T.,  
753 Mann, C., Amanat, F., Dayal, D., *et al.* (2021). Subtle immunological differences in mRNA-  
754 1273 and BNT162b2 COVID-19 vaccine induced Fc-functional profiles. *bioRxiv*.

- 755 Karsten, C.B., Mehta, N., Shin, S.A., Diefenbach, T.J., Slein, M.D., Karpinski, W., Irvine, E.B.,  
756 Broge, T., Suscovich, T.J., and Alter, G. (2019). A versatile high-throughput assay to  
757 characterize antibody-mediated neutrophil phagocytosis. *J Immunol Methods* 471, 46-56.  
758
- 759 Kennedy, N.A., Goodhand, J.R., Bewshea, C., Nice, R., Chee, D., Lin, S., Chanchlani, N.,  
760 Butterworth, J., Cooney, R., Croft, N.M., *et al.* (2021). Anti-SARS-CoV-2 antibody responses  
761 are attenuated in patients with IBD treated with infliximab. *Gut* 70, 865-875.  
762
- 763 Khoury, D.S., Cromer, D., Reynaldi, A., Schlub, T.E., Wheatley, A.K., Juno, J.A., Subbarao, K.,  
764 Kent, S.J., Triccas, J.A., and Davenport, M.P. (2021). Neutralizing antibody levels are highly  
765 predictive of immune protection from symptomatic SARS-CoV-2 infection. *Nature Medicine* 27,  
766 1205-1211.  
767
- 768 Klimstra, W.B., Tilston-Lunel, N.L., Nambulli, S., Boslett, J., McMillen, C.M., Gilliland, T.,  
769 Dunn, M.D., Sun, C., Wheeler, S.E., Wells, A., *et al.* (2020). SARS-CoV-2 growth, furin-  
770 cleavage-site adaptation and neutralization using serum from acutely infected hospitalized  
771 COVID-19 patients. *The Journal of general virology* 101, 1156-1169.  
772
- 773 Letko, M., Marzi, A., and Munster, V. (2020). Functional assessment of cell entry and receptor  
774 usage for SARS-CoV-2 and other lineage B betacoronaviruses. *Nat Microbiol* 5, 562-569.  
775
- 776 Liu, C., Ginn, H.M., Dejnirattisai, W., Supasa, P., Wang, B., Tuekprakhon, A., Nutalai, R.,  
777 Zhou, D., Mentzer, A.J., Zhao, Y., *et al.* (2021a). Reduced neutralization of SARS-CoV-2  
778 B.1.617 by vaccine and convalescent serum. *Cell* 184, 4220-4236.e4213.  
779
- 780 Liu, J., Liu, Y., Xia, H., Zou, J., Weaver, S.C., Swanson, K.A., Cai, H., Cutler, M., Cooper, D.,  
781 Muik, A., *et al.* (2021b). BNT162b2-elicited neutralization of B.1.617 and other SARS-CoV-2  
782 variants. *Nature* 596, 273-275.  
783
- 784 Liu, Y., Liu, J., Xia, H., Zhang, X., Fontes-Garfias, C.R., Swanson, K.A., Cai, H., Sarkar, R.,  
785 Chen, W., Cutler, M., *et al.* (2021c). Neutralizing Activity of BNT162b2-Elicited Serum. *N Engl*  
786 *J Med* 384, 1466-1468.  
787
- 788 Liu, Z., VanBlargan, L.A., Bloyet, L.M., Rothlauf, P.W., Chen, R.E., Stumpf, S., Zhao, H.,  
789 Errico, J.M., Theel, E.S., Liebeskind, M.J., *et al.* (2021d). Identification of SARS-CoV-2 spike  
790 mutations that attenuate monoclonal and serum antibody neutralization. *Cell Host Microbe* 29,  
791 477-488.e474.  
792
- 793 Lopez Bernal, J., Andrews, N., Gower, C., Gallagher, E., Simmons, R., Thelwall, S., Stowe, J.,  
794 Tessier, E., Groves, N., Dabrera, G., *et al.* (2021). Effectiveness of Covid-19 Vaccines against  
795 the B.1.617.2 (Delta) Variant. *N Engl J Med* 385, 585-594.  
796
- 797 Madhi, S.A., Baillie, V., Cutland, C.L., Voysey, M., Koen, A.L., Fairlie, L., Padayachee, S.D.,  
798 Dheda, K., Barnabas, S.L., Bhorat, Q.E., *et al.* (2021). Efficacy of the ChAdOx1 nCoV-19  
799 Covid-19 Vaccine against the B.1.351 Variant. *N Engl J Med* 384, 1885-1898.  
800

801 McCallum, M., Bassi, J., Marco, A., Chen, A., Walls, A.C., Iulio, J.D., Tortorici, M.A., Navarro,  
802 M.J., Silacci-Fregni, C., Saliba, C., *et al.* (2021). SARS-CoV-2 immune evasion by variant  
803 B.1.427/B.1.429. bioRxiv.  
804  
805 Murphy, K., and Weaver, C. (2016). *Janeway's immunobiology* (Garland science).  
806  
807 Park, S.H., Yang, S.K., Park, S.K., Kim, J.W., Yang, D.H., Jung, K.W., Kim, K.J., Ye, B.D.,  
808 Byeon, J.S., Myung, S.J., *et al.* (2014). Efficacy of hepatitis A vaccination and factors impacting  
809 on seroconversion in patients with inflammatory bowel disease. *Inflamm Bowel Dis* 20, 69-74.  
810  
811 Pinto, D., Park, Y.-J., Beltramello, M., Walls, A.C., Tortorici, M.A., Bianchi, S., Jaconi, S.,  
812 Culap, K., Zatta, F., De Marco, A., *et al.* (2020). Cross-neutralization of SARS-CoV-2 by a  
813 human monoclonal SARS-CoV antibody. *Nature* 583, 290-295.  
814  
815 Planas, D., Veyer, D., Baidaliuk, A., Staropoli, I., Guivel-Benhassine, F., Rajah, M.M.,  
816 Planchais, C., Porrot, F., Robillard, N., Puech, J., *et al.* (2021). Reduced sensitivity of SARS-  
817 CoV-2 variant Delta to antibody neutralization. *Nature* 596, 276-280.  
818  
819 Plante, J.A., Liu, Y., Liu, J., Xia, H., Johnson, B.A., Lokugamage, K.G., Zhang, X., Muruato,  
820 A.E., Zou, J., Fontes-Garfias, C.R., *et al.* (2021). Spike mutation D614G alters SARS-CoV-2  
821 fitness. *Nature* 592, 116-121.  
822  
823 Pratt, P.K., Jr., David, N., Weber, H.C., Little, F.F., Kourkoumpetis, T., Patts, G.J., Weinberg, J.,  
824 and Farraye, F.A. (2018). Antibody Response to Hepatitis B Virus Vaccine is Impaired in  
825 Patients With Inflammatory Bowel Disease on Infliximab Therapy. *Inflamm Bowel Dis* 24, 380-  
826 386.  
827  
828 Qin, C.X., Moore, L.W., Anjan, S., Rahamimov, R., Sifri, C.D., Ali, N.M., Morales, M.K.,  
829 Tsapepas, D.S., Basic-Jukic, N., Miller, R.A., *et al.* (2021). Risk of Breakthrough SARS-CoV-2  
830 Infections in Adult Transplant Recipients. *Transplantation*.  
831  
832 Sadoff, J., Gray, G., Vandebosch, A., Cárdenas, V., Shukarev, G., Grinsztejn, B., Goepfert, P.A.,  
833 Truyers, C., Fennema, H., Spiessens, B., *et al.* (2021). Safety and Efficacy of Single-Dose  
834 Ad26.COV2.S Vaccine against Covid-19. *N Engl J Med* 384, 2187-2201.  
835  
836 Schäfer, A., Muecksch, F., Lorenzi, J.C.C., Leist, S.R., Cipolla, M., Bournazos, S., Schmidt, F.,  
837 Maison, R.M., Gazumyan, A., Martinez, D.R., *et al.* (2021). Antibody potency, effector function,  
838 and combinations in protection and therapy for SARS-CoV-2 infection in vivo. *J Exp Med* 218.  
839 Sempowski, G.D., Saunders, K.O., Acharya, P., Wiehe, K.J., and Haynes, B.F. (2020). Pandemic  
840 Preparedness: Developing Vaccines and Therapeutic Antibodies For COVID-19. *Cell* 181, 1458-  
841 1463.  
842  
843 Shi, R., Shan, C., Duan, X., Chen, Z., Liu, P., Song, J., Song, T., Bi, X., Han, C., Wu, L., *et al.*  
844 (2020). A human neutralizing antibody targets the receptor-binding site of SARS-CoV-2. *Nature*  
845 584, 120-124.  
846

- 847 Shiakolas, A.R., Kramer, K.J., Wrapp, D., Richardson, S.I., Schäfer, A., Wall, S., Wang, N.,  
848 Janowska, K., Pilewski, K.A., Venkat, R., *et al.* (2021). Cross-reactive coronavirus antibodies  
849 with diverse epitope specificities and Fc effector functions. *Cell Rep Med* 2, 100313.  
850
- 851 Shinde, V., Bhikha, S., Hoosain, Z., Archary, M., Bhorat, Q., Fairlie, L., Lalloo, U., Masilela,  
852 M.S.L., Moodley, D., Hanley, S., *et al.* (2021). Efficacy of NVX-CoV2373 Covid-19 Vaccine  
853 against the B.1.351 Variant. *N Engl J Med* 384, 1899-1909.  
854
- 855 Shirai, S., Hara, M., Sakata, Y., Tsuruoka, N., Yamamoto, K., Shimoda, R., Gomi, Y., Yoshii,  
856 H., Fujimoto, K., and Iwakiri, R. (2018). Immunogenicity of Quadrivalent Influenza Vaccine for  
857 Patients with Inflammatory Bowel Disease Undergoing Immunosuppressive Therapy.  
858 *Inflammatory bowel diseases* 24, 1082-1091.  
859
- 860 Sievert, C. (2020). Interactive Web-Based Data Visualization with R, plotly, and shiny.  
861 Stadlbauer, D., Amanat, F., Chromikova, V., Jiang, K., Strohmeier, S., Arunkumar, G.A., Tan,  
862 J., Bhavsar, D., Capuano, C., Kirkpatrick, E., *et al.* (2020). SARS-CoV-2 Seroconversion in  
863 Humans: A Detailed Protocol for a Serological Assay, Antigen Production, and Test Setup.  
864 *Current Protocols in Microbiology* 57, e100.  
865
- 866 Suryadevara, N., Shrihari, S., Gilchuk, P., VanBlargan, L.A., Binshtein, E., Zost, S.J., Nargi,  
867 R.S., Sutton, R.E., Winkler, E.S., Chen, E.C., *et al.* (2021). Neutralizing and protective human  
868 monoclonal antibodies recognizing the N-terminal domain of the SARS-CoV-2 spike protein.  
869 *Cell* 184, 2316-2331.e2315.  
870
- 871 Tada, T., Dcosta, B.M., Samanovic-Golden, M., Herati, R.S., Cornelius, A., Mulligan, M.J., and  
872 Landau, N.R. (2021). Neutralization of viruses with European, South African, and United States  
873 SARS-CoV-2 variant spike proteins by convalescent sera and BNT162b2 mRNA vaccine-  
874 elicited antibodies. *bioRxiv*.  
875
- 876 Thomas, S.J., Moreira, E.D., Jr., Kitchin, N., Absalon, J., Gurtman, A., Lockhart, S., Perez, J.L.,  
877 Pérez Marc, G., Polack, F.P., Zerbini, C., *et al.* (2021). Safety and Efficacy of the BNT162b2  
878 mRNA Covid-19 Vaccine through 6 Months. *N Engl J Med*.  
879
- 880 Turner, J.S., O'Halloran, J.A., Kalaidina, E., Kim, W., Schmitz, A.J., Zhou, J.Q., Lei, T., Thapa,  
881 M., Chen, R.E., Case, J.B., *et al.* (2021). SARS-CoV-2 mRNA vaccines induce persistent human  
882 germinal centre responses. *Nature* 596, 109-113.  
883
- 884 Ullah, I., Prévost, J., Ladinsky, M.S., Stone, H., Lu, M., Anand, S.P., Beaudoin-Bussièrès, G.,  
885 Symmes, K., Benlarbi, M., Ding, S., *et al.* (2021). Live imaging of SARS-CoV-2 infection in  
886 mice reveals that neutralizing antibodies require Fc function for optimal efficacy. *Immunity* 54,  
887 2143-2158.e2115.  
888
- 889 VanBlargan, L.A., Adams, L.J., Liu, Z., Chen, R.E., Gilchuk, P., Raju, S., Smith, B.K., Zhao, H.,  
890 Case, J.B., Winkler, E.S., *et al.* A potentially neutralizing SARS-CoV-2 antibody inhibits variants  
891 of concern by utilizing unique binding residues in a highly conserved epitope. *Immunity*.  
892

893 Wang, P., Casner, R.G., Nair, M.S., Wang, M., Yu, J., Cerutti, G., Liu, L., Kwong, P.D., Huang,  
894 Y., Shapiro, L., *et al.* (2021a). Increased resistance of SARS-CoV-2 variant P.1 to antibody  
895 neutralization. *Cell Host Microbe* 29, 747-751.e744.  
896  
897 Wang, P., Nair, M.S., Liu, L., Iketani, S., Luo, Y., Guo, Y., Wang, M., Yu, J., Zhang, B.,  
898 Kwong, P.D., *et al.* (2021b). Antibody resistance of SARS-CoV-2 variants B.1.351 and B.1.1.7.  
899 *Nature* 593, 130-135.  
900  
901 Wibmer, C.K., Ayres, F., Hermanus, T., Madzivhandila, M., Kgagudi, P., Lambson, B.E.,  
902 Vermeulen, M., van den Berg, K., Rossouw, T., Boswell, M., *et al.* (2021). SARS-CoV-2  
903 501Y.V2 escapes neutralization by South African COVID-19 donor plasma. *bioRxiv*.  
904  
905 Winkler, E.S., Gilchuk, P., Yu, J., Bailey, A.L., Chen, R.E., Chong, Z., Zost, S.J., Jang, H.,  
906 Huang, Y., Allen, J.D., *et al.* (2021). Human neutralizing antibodies against SARS-CoV-2  
907 require intact Fc effector functions for optimal therapeutic protection. *Cell* 184, 1804-  
908 1820.e1816.  
909  
910 Yamin, R., Jones, A.T., Hoffmann, H.H., Schäfer, A., Kao, K.S., Francis, R.L., Sheahan, T.P.,  
911 Baric, R.S., Rice, C.M., Ravetch, J.V., *et al.* (2021). Fc-engineered antibody therapeutics with  
912 improved anti-SARS-CoV-2 efficacy. *Nature*.  
913  
914 Zang, R., Gomez Castro, M.F., McCune, B.T., Zeng, Q., Rothlauf, P.W., Sonnek, N.M., Liu, Z.,  
915 Brulois, K.F., Wang, X., Greenberg, H.B., *et al.* (2020). TMPRSS2 and TMPRSS4 promote  
916 SARS-CoV-2 infection of human small intestinal enterocytes. *Sci Immunol* 5.  
917  
918 Zohar, T., Loos, C., Fischinger, S., Atyeo, C., Wang, C., Slein, M.D., Burke, J., Yu, J., Feldman,  
919 J., Hauser, B.M., *et al.* (2020). Compromised Humoral Functional Evolution Tracks with SARS-  
920 CoV-2 Mortality. *Cell* 183, 1508-1519.e1512.  
921  
922 Zost, S.J., Gilchuk, P., Chen, R.E., Case, J.B., Reidy, J.X., Trivette, A., Nargi, R.S., Sutton, R.E.,  
923 Suryadevara, N., Chen, E.C., *et al.* (2020). Rapid isolation and profiling of a diverse panel of  
924 human monoclonal antibodies targeting the SARS-CoV-2 spike protein. *Nature Medicine* 26,  
925 1422-1427.  
926

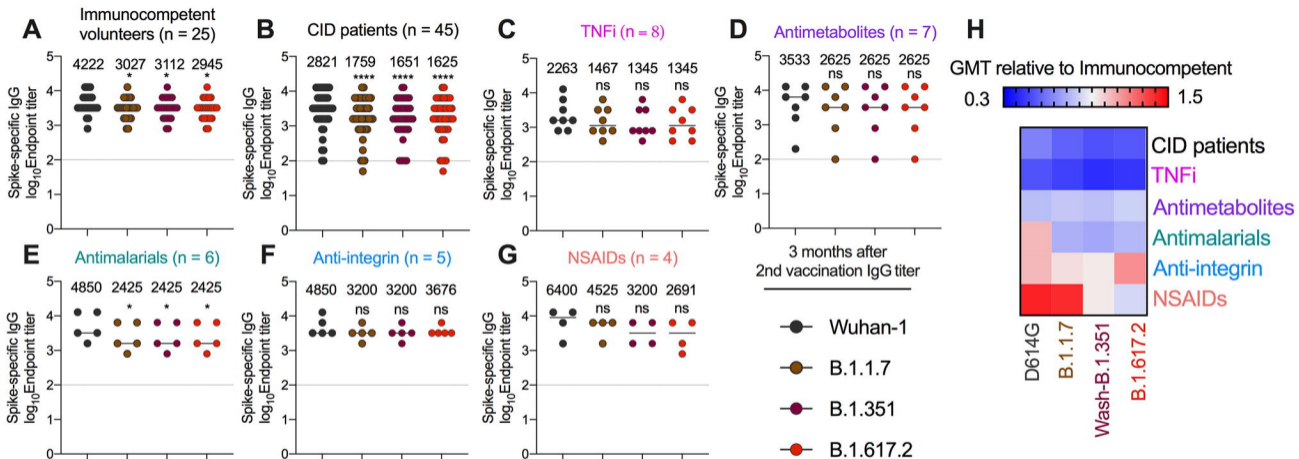

**Figure 1**

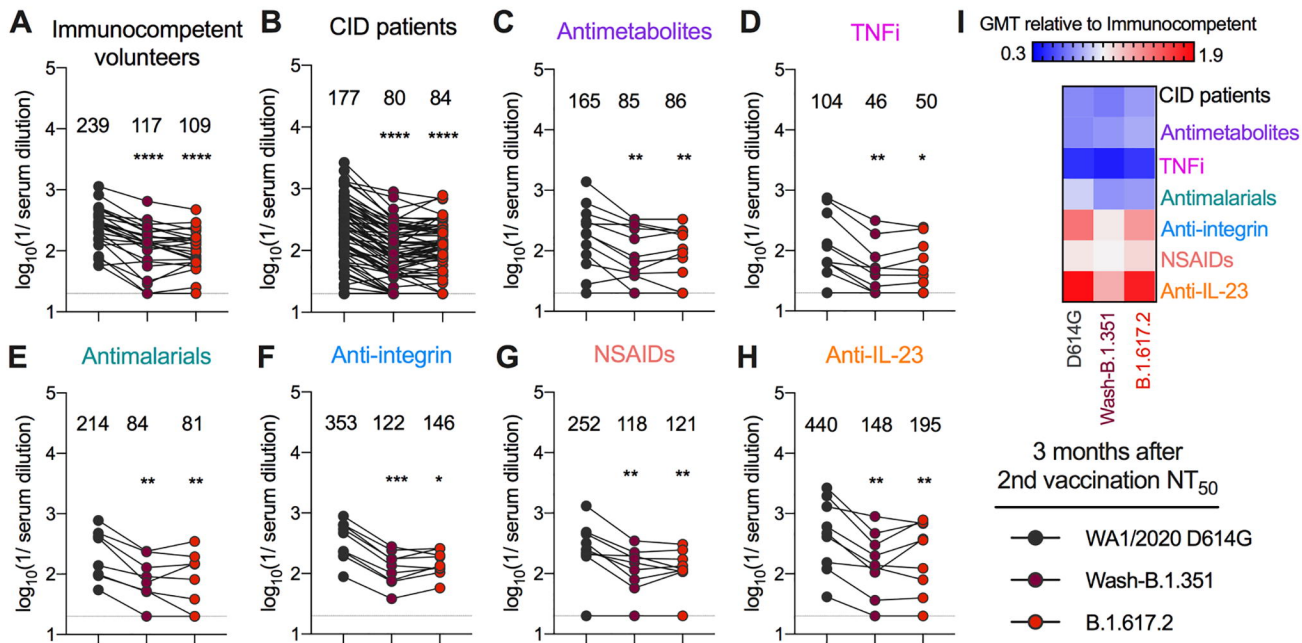

**Figure 2**



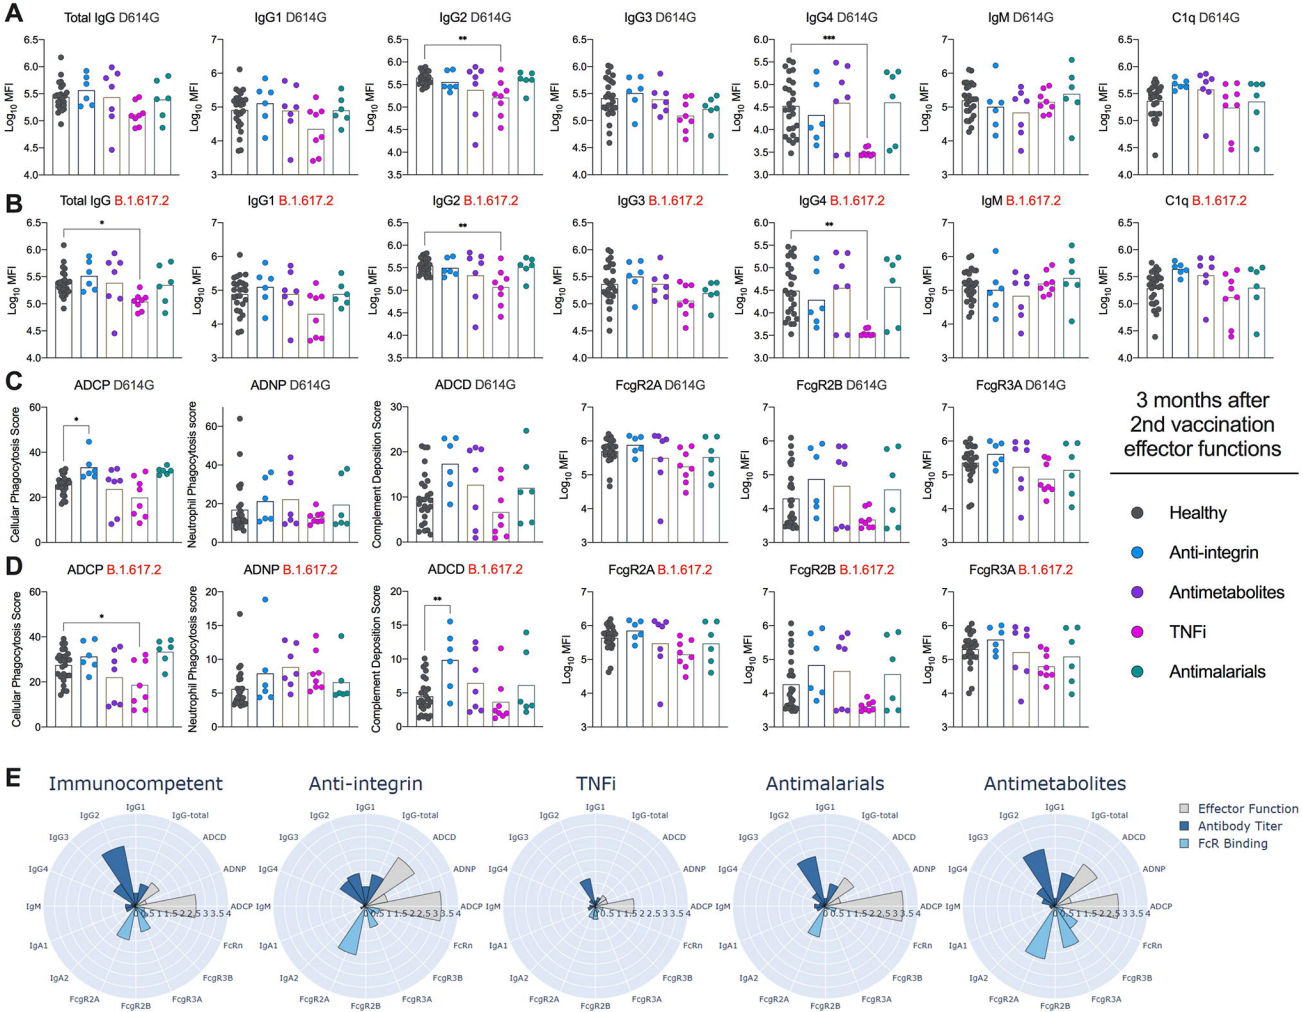

**Figure 3**

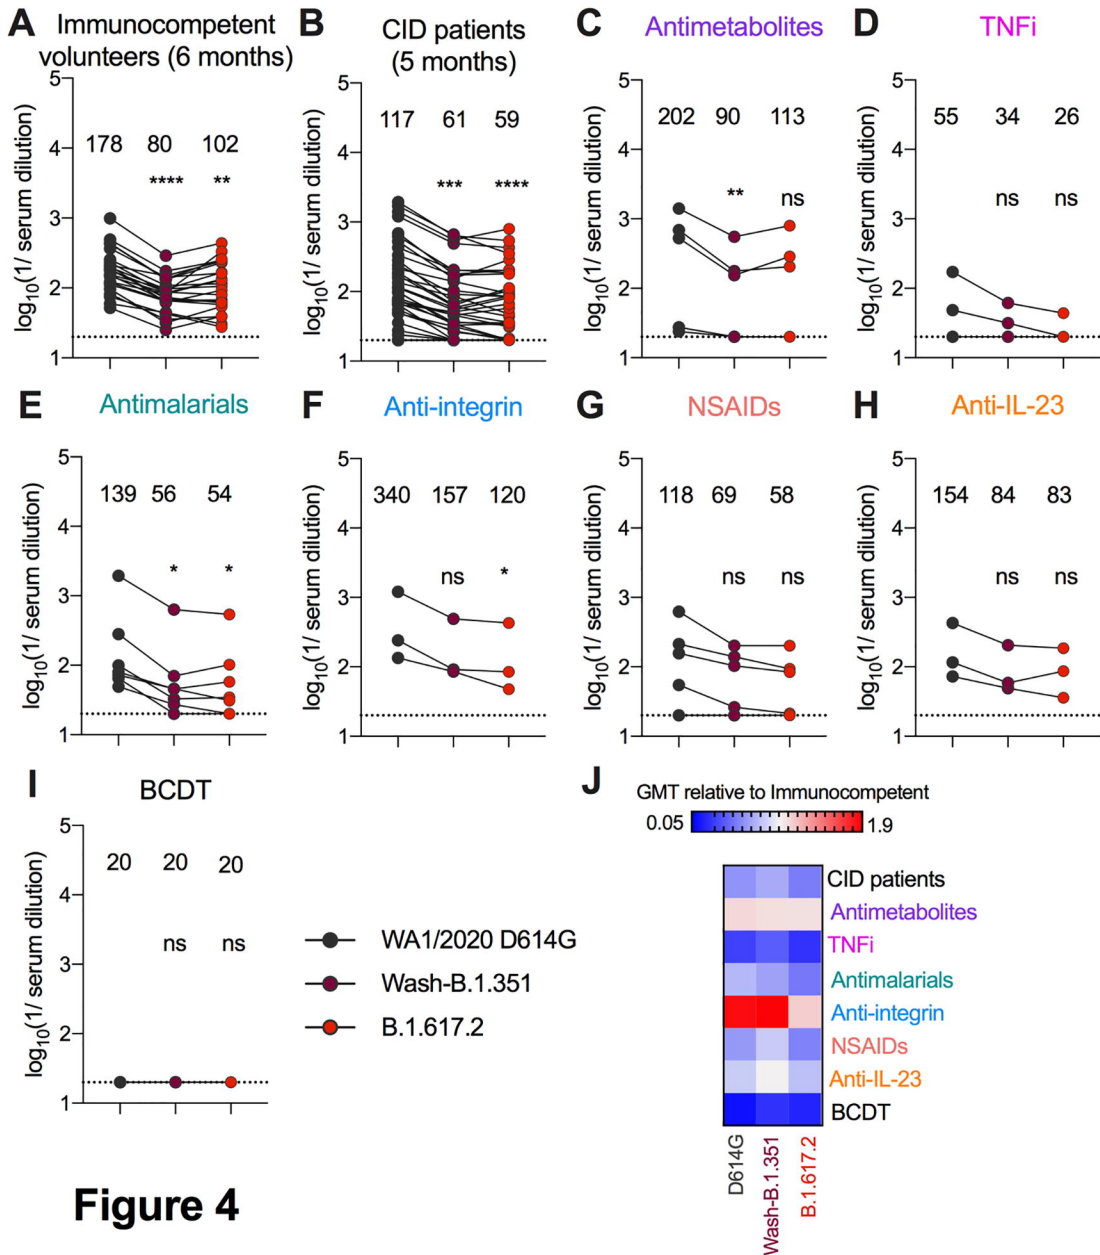

**Figure 4**
